# Supplementary material for: Elucidating physiological and biochemical alterations in giant duckweed (Spirodela polyrhiza L. Schleiden) under diethyl phthalate stress: insights into antioxidant defence system
Source: PeerJ. 2020 Jan 9;8:e8267. doi: 10.7717/peerj.8267 (PMC6955107; doi:10.7717/peerj.8267)
Supplement: Dataset S2 [file peerj-08-8267-s002.xlsx]

## Sheet: SOD activity
	SOD	DEP
conc	sp activity	MEAN	SD	SE
control	52.1567	54.8325	16.7942	9.69615
	72.8039
	39.5368
10ppm	63.7133	84.5431	48.9598	28.267
	49.4427
	140.473
20ppm	118.21	115.849	21.7701	12.5689
	92.9943
	136.342
40ppm	115.019	112.202	10.3887	5.99795
	120.891
	100.695
80ppm	156.898	114.653	42.2641	24.4012
	72.37
	114.692
100ppm	121.006	131.269	36.0183	20.7952
	101.497
	171.305
200ppm	104.299	121.333	16.5808	9.57293
	122.28
	137.42
	#DIV/0!
400ppm	130.748	151.718	35.5055	20.4991
	192.713
	131.694

## Sheet: CAT activity
	CAT	DEP
conc	specific activity	MEAN	SD	SE
control	0.0709165	0.0694805	0.0322315	0.0186088
	0.10097
	0.036555
10ppm	0.0909612	0.100639	0.0222223	0.0128301
	0.0848972
	0.126059
20ppm	0.33718	0.188131	0.129679	0.0748705
	0.101154
	0.126059
40ppm	0.186774	0.228146	0.0831776	0.0480226
	0.173766
	0.323897
80ppm	0.40411	0.279435	0.113461	0.0655067
	0.182234
	0.251961
100ppm	0.238205	0.295026	0.0533545	0.0308042
	0.302818
	0.344057
200ppm	0.228569	0.284924	0.126444	0.0730027
	0.196456
	0.429748
400ppm	0.24678	0.249662	0.0424419	0.0245038
	0.293472
	0.208735

## Sheet: APOX activity
APX	DEP
conc	sp activity	MEAN	SD	SE
control	0.249474	0.662501	0.45496	0.262671
	1.15016
	0.587864
10ppm	2.62086	2.04272	0.616626	0.356009
	2.11357
	1.39373
20ppm	3.55846	2.72753	0.741048	0.427844
	2.13507
	2.48907
40ppm	3.8228	3.52279	0.324316	0.187244
	3.17868
	3.56689
80ppm	2.17073	2.59533	0.615279	0.355231
	2.31431
	3.30094
100ppm	2.0239	3.65706	1.62881	0.940396
	3.66579
	5.2815
200ppm	1.73185	1.78672	0.778944	0.449723
	2.59164
	1.03666
400ppm	1.96551	1.7336	0.580194	0.334975
	2.16196
	1.07331

## Sheet: GPOX activity
	DEP	GPOX
conc	specific activity	MEAN	SD	SE
control	0.991635	1.05182	0.311698	0.179959
	1.38922
	0.774598
10ppm	0.341321	0.874024	0.621819	0.359007
	1.5573
	0.723447
20ppm	0.0839057	0.783456	1.01511	0.586076
	0.318722
	1.94774
40ppm	0.747694	0.722729	0.0716995	0.0413957
	0.778608
	0.641884
80ppm	1.28551	1.05846	0.199731	0.115315
	0.909888
	0.979973
100ppm	1.33462	1.46134	0.399598	0.230708
	1.14047
	1.90893
200ppm	1.35832	1.77445	0.361508	0.208717
	1.95407
	2.01098
	#DIV/0!
400ppm	1.64809	2.27683	0.553124	0.319346
	2.49393
	2.68846

## Sheet: GR activity
DEP GR	SA	MEAN	SD	SE
control	6.22161	6.4445	1.95097	1.12639
	8.49733
	4.61455
10	6.25573	7.99886	4.40091	2.54086
	4.73654
	13.0043
	#DIV/0!
20	13.8829	11.2617	2.86109	1.65185
	8.20962
	11.6925
	#DIV/0!
40	14.3048	13.636	1.50846	0.870909
	14.6944
	11.9087
	#DIV/0!
80	15.8105	11.5535	4.25892	2.45889
	7.29268
	11.5574
	#DIV/0!
100	20.2082	21.2586	5.43618	3.13858
	16.4243
	27.1434
	#DIV/0!
200	17.0958	21.1762	3.53571	2.04134
	23.3331
	23.0998
	#DIV/0!
400	19.4655	22.1348	5.1906	2.99679
	28.1169
	18.8221

## Sheet: graphs
SOD
conc	DEP	SE
control	54.8325	9.69615
10 ppm	84.5431	28.267
20 ppm	115.849	12.5689
40 ppm	112.202	5.99795
80 ppm	114.653	24.4012
100 ppm	131.269	20.7952
200 ppm	121.333	9.57293
400 ppm	151.718	20.4991
APX
conc	DEP	SE
control	0.662501	0.262671
10 ppm	2.04272	0.356009
20 ppm	2.72753	0.427844
40 ppm	3.52279	0.187244
80 ppm	2.59533	0.355231
100 ppm	3.65706	0.940396
G	1.78672	0.449723
400 ppm	1.7336	0.334975
CAT
conc	DEP	SE
control	0.0694805	0.0186088
10 ppm	0.100639	0.0128301
20 ppm	0.188131	0.0748705
40 ppm	0.228146	0.0480226
80 ppm	0.279435	0.0655067
100 ppm	0.295026	0.0308042
200 ppm	0.284924	0.0730027
400 ppm	0.249662	0.0245038
GPX
conc	DEP	SE
control	1.05182	0.179959
10 ppm	0.874024	0.359007
20 ppm	0.783456	0.586076
40 ppm	0.722729	0.0413957
80 ppm	1.05846	0.115315
100 ppm	1.46134	0.230708
200 ppm	1.77445	0.208717
400 ppm	2.27683	0.319346
GR
conc	DEP	SE
control	6.4445	1.12639
10 ppm	7.99886	2.54086
20 ppm	11.2617	1.65185
40 ppm	13.636	0.870909
80 ppm	11.5535	2.45889
100 ppm	21.2586	3.13858
200 ppm	21.1762	2.04134
400 ppm	22.1348	2.99679
