# Supplementary material for: Elucidating physiological and biochemical alterations in giant duckweed (Spirodela polyrhiza L. Schleiden) under diethyl phthalate stress: insights into antioxidant defence system
Source: PeerJ. 2020 Jan 9;8:e8267. doi: 10.7717/peerj.8267 (PMC6955107; doi:10.7717/peerj.8267)
Supplement: Dataset S5 [file peerj-08-8267-s005.xlsx]

## Sheet: Carbohydrate content
		Carbohydrate content (mg/gfw)
conc (ppm)		MEAN	SD	SE
control	74.19	83.89	8.6238	4.97896
	86.79
	90.69
10	44.19	51.79	7.97308	4.60326
	60.09
	51.09
20	36.99	41.89	4.55302	2.62869
	42.69
	45.99
40	9.09	41.99	28.5021	16.4557
	57.69
	59.19
80	31.89	28.69	3.30454	1.90788
	28.89
	25.29
100	20.79	12.89	7.30137	4.21545
	6.39
	11.49
200	30.69	17.09	11.9637	6.90724
	12.39
	8.19
400	13.59	10.99	2.33024	1.34536
	9.09
	10.29

## Sheet: Protein content
DEP	protein content	MEAN	SD	SE
control	0.536844	0.553927	0.167218	0.0965435
	0.395906
	0.729031
10ppm	0.439469	0.411281	0.187378	0.108183
	0.582969
	0.211406
20ppm	0.180656	0.231052	0.0625761	0.0361283
	0.301094
	0.211406
40ppm	0.224219	0.237885	0.0282263	0.0162965
	0.219094
	0.270344
80ppm	0.160156	0.242156	0.09564	0.0552178
	0.347219
	0.219094
100ppm	0.226781	0.183219	0.05478	0.0316272
	0.201156
	0.121719
200ppm	0.216531	0.175531	0.035507	0.0205
	0.155031
	0.155031
400ppm	0.149906	0.13624	0.0282263	0.0162965
	0.103781
	0.155031

## Sheet: MDA content
Conc	MDA	MEAN	SD	SE
control	16.129	12.172	3.44865	1.99108
	9.80645
	10.5806
	0
10ppm	15.3548	14.5376	1.644	0.949165
	15.6129
	12.6452
	0
20pppm	15.0968	14.1505	1.75186	1.01144
	15.2258
	12.129
40ppm	16	16.129	0.846121	0.488508
	17.0323
	15.3548
	0
80ppm	16.3871	16.3871	0.129032	0.0744968
	16.2581
	16.5161
	0
100ppm	17.2903	16.5161	1.56975	0.906293
	17.5484
	14.7097
	0
200ppm	17.9355	17.4194	0.682775	0.3942
	17.6774
	16.6452
	0
400ppm	18.1935	17.3333	1.273	0.734968
	15.871
	17.9355

## Sheet: Total phenolic content
conc (ppm)	phenol	MEAN	SD	SE
control	0.520252	0.510189	0.286925	0.165656
	0.79195
	0.218365
10	0.520252	0.604109	0.0913084	0.0527169
	0.590692
	0.701384
20	0.882516	0.808721	0.136623	0.0788795
	0.892579
	0.651069
40	0.560503	0.540377	0.202011	0.116631
	0.731572
	0.329057
80	0.570566	0.436394	0.182617	0.105434
	0.228428
	0.510189
100	0.490063	0.547086	0.182894	0.105594
	0.399497
	0.751698
200	0.661132	0.519916	0.16529	0.0954302
	0.560503
	0.338113
400	0.449811	0.624235	0.284859	0.164463
	0.952956
	0.469937

## Sheet: Proline content
conc (ppm)	proline		MEAN	SD	SE
control	14.9797		10.5362	8.1771	4.72105
	15.5294
	1.09943
10	25.5617		20.5685	9.61641	5.55204
	26.6612
	9.48258
20	25.8366		24.1416	1.87596	1.08308
	24.4623
	22.126
40	15.5294		27.8522	10.9395	6.31591
	36.4186
	31.6086
80	12.0937		21.9886	8.57361	4.94998
	26.6612
	27.2109
100	39.9918		31.3337	8.39666	4.84781
	30.784
	23.2255
200	41.5035		38.4342	2.96137	1.70975
	38.2052
	35.594
400	39.5795		38.8465	2.95498	1.70606
	35.594
	41.366

## Sheet: Electrolyte leakage
	Electrolyte leakage(%)		MEAN	SD	SE
conc(ppm)	56.1321		56.0907	0.566596	0.327124
control	55.5046
	56.6355
10	50.4348		57.5954	9.60504	5.54547
	53.8408
	68.5106
20	53.8992		55.4504	2.30187	1.32899
	58.0952
	54.3568
40	74.1259		77.0338	3.15945	1.82411
	80.3957
	76.5799
80	90.9598		91.2259	2.06707	1.19342
	93.4132
	89.3048
100	92.0213		92.9096	1.99303	1.15068
	95.1923
	91.5152
200	92.381		92.5753	0.170686	0.0985456
	92.6443
	92.7007
400	94.9275		95.4514	3.62071	2.09042
	99.3056
	92.1212
